# Supplementary material for: Predicting COVID-19 vaccination uptake in Armenia using the Health Belief Model: Results from a nationwide survey
Source: PubMed Central journal article supplement — Hum Vaccin Immunother. 2023 Jan 23;19(1):2165383. doi: 10.1080/21645515.2023.2165383 (PMC9980550; doi:10.1080/21645515.2023.2165383), 2023-01-23
Supplement: KHVI_A_2165383_SM3276.pdf [file KHVI_A_2165383_SM3276.pdf]

**Supplementary Table S1: Questions measuring HBM constructs and vaccination intent in the study questionnaire**

|                                                      |                                                                                                                                                                                                                                                                                                                                                                                                                                                              |
|------------------------------------------------------|--------------------------------------------------------------------------------------------------------------------------------------------------------------------------------------------------------------------------------------------------------------------------------------------------------------------------------------------------------------------------------------------------------------------------------------------------------------|
| <p><b>Intention to get vaccinated</b></p>            | <p>When a coronavirus vaccination becomes available to you, how likely is it you will take it?</p> <p><input type="radio"/> Very likely<br/> <input type="radio"/> Likely<br/> <input type="radio"/> Unlikely<br/> <input type="radio"/> Very unlikely<br/> <input type="radio"/> [prefer not to answer]</p>                                                                                                                                                 |
| <p><u>Perceived susceptibility</u></p>               | <p>How susceptible do you consider yourself to an infection with COVID-19?</p> <p><input type="radio"/> Very susceptible<br/> <input type="radio"/> Susceptible<br/> <input type="radio"/> Not susceptible<br/> <input type="radio"/> Not at all susceptible<br/> <input type="radio"/> [prefer not to answer]</p>                                                                                                                                           |
| <p><u>Perceived severity</u></p>                     | <p>How severe would contracting COVID-19 be for you (how seriously ill do you think you would be)?</p> <p><input type="radio"/> Very severe<br/> <input type="radio"/> Severe<br/> <input type="radio"/> Not severe<br/> <input type="radio"/> Not at all severe<br/> <input type="radio"/> [prefer not to answer]</p>                                                                                                                                       |
| <p><u>Perceived benefits of COVID-19 vaccine</u></p> | <p>COVID-19 vaccine protects from severe disease and death from COVID-19.</p> <p><input type="radio"/> Strongly agree<br/> <input type="radio"/> Agree<br/> <input type="radio"/> Disagree<br/> <input type="radio"/> Strongly disagree</p>                                                                                                                                                                                                                  |
| <p><u>Perceived barriers to COVID-19 vaccine</u></p> | <p>A COVID-19 vaccine could give me COVID-19 disease.</p> <p><input type="radio"/> Strongly agree<br/> <input type="radio"/> Agree<br/> <input type="radio"/> Disagree<br/> <input type="radio"/> Strongly disagree</p> <p>I am likely to experience side effects from a COVID-19 vaccine.</p> <p><input type="radio"/> Strongly agree<br/> <input type="radio"/> Agree<br/> <input type="radio"/> Disagree<br/> <input type="radio"/> Strongly disagree</p> |

|                                                                        |                                                                                                                                                                                                                                                                                                                                                                                                                                                                                                                                                                                                                                                                                                                                                                                                                                                                                                                                                                                                                                                                                                                                                                                                                                                                                                                                                                                  |
|------------------------------------------------------------------------|----------------------------------------------------------------------------------------------------------------------------------------------------------------------------------------------------------------------------------------------------------------------------------------------------------------------------------------------------------------------------------------------------------------------------------------------------------------------------------------------------------------------------------------------------------------------------------------------------------------------------------------------------------------------------------------------------------------------------------------------------------------------------------------------------------------------------------------------------------------------------------------------------------------------------------------------------------------------------------------------------------------------------------------------------------------------------------------------------------------------------------------------------------------------------------------------------------------------------------------------------------------------------------------------------------------------------------------------------------------------------------|
| <p><u>Self-efficacy for COVID-19 vaccination</u></p>                   | <p>It would be very easy for me to have a coronavirus vaccination.</p> <p><input type="radio"/> Strongly agree</p> <p><input type="radio"/> Agree</p> <p><input type="radio"/> Disagree</p> <p><input type="radio"/> Strongly disagree</p>                                                                                                                                                                                                                                                                                                                                                                                                                                                                                                                                                                                                                                                                                                                                                                                                                                                                                                                                                                                                                                                                                                                                       |
| <p><u>Cues to action</u></p> <p>Sources of information on COVID-19</p> | <p>On a scale from 1 to 7, how often do you use the following sources of information about COVID-19?</p> <ul style="list-style-type: none"> <li>▪ <u>Television</u><br/>[1 Never] [2] [3] [4] [5] [6] [7 Very often]<br/><input type="radio"/> [prefer not to answer]</li> <li>▪ <u>Printed newspapers</u><br/>[1 Never] [2] [3] [4] [5] [6] [7 Very often]<br/><input type="radio"/> [prefer not to answer]</li> <li>▪ <u>e-Newspapers</u><br/>[1 Never] [2] [3] [4] [5] [6] [7 Very often]<br/><input type="radio"/> [prefer not to answer]</li> <li>▪ <u>Health care providers at health facilities</u><br/>[1 Never] [2] [3] [4] [5] [6] [7 Very often]<br/><input type="radio"/> [prefer not to answer]</li> <li>▪ <u>Social media (for example, Facebook, Instagram, Twitter)</u><br/>[1 Never] [2] [3] [4] [5] [6] [7 Very often]<br/><input type="radio"/> [prefer not to answer]</li> <li>▪ <u>Radio</u><br/>[1 Never] [2] [3] [4] [5] [6] [7 Very often]<br/><input type="radio"/> [prefer not to answer]</li> <li>▪ <u>Internet websites (including news agencies, blogs, sites of medical agencies, etc.)</u><br/>[1 Never] [2] [3] [4] [5] [6] [7 Very often]<br/><input type="radio"/> [prefer not to answer]</li> <li>▪ <u>Friends and relatives</u><br/>[1 Never] [2] [3] [4] [5] [6] [7 Very often]<br/><input type="radio"/> [prefer not to answer]</li> </ul> |
